# Supplementary material for: High RBM3 expression is associated with an improved survival and oxaliplatin response in patients with metastatic colorectal cancer
Source: PLoS One. 2017 Aug 11;12(8):e0182512. doi: 10.1371/journal.pone.0182512 (PMC5553773; doi:10.1371/journal.pone.0182512)
Supplement: S3 Table — CR = complete response, PR = partial response, PD = progressive disease. (XLSX) [file pone.0182512.s003.xlsx]

## Sheet: Sheet1
		Cytoplasmic expression RBM3
	All patients	High	Low	p-value	Positive	Negative	p-value
	(%)	expression	expression		expression	expression
		N(%)	N (%)		N(%)	N (%)
All patients	455	329 (72)	126 (28)		388 (85)	67 (15)
1-line chemotherapy	283 (62)	209 (64)	74 (59)	0.346	242 (62)	41 (61)	0.855
1-line combination oxaliplatin	166 (36)	129 (39)	37 (29)	0.062	146 (38)	20 (30)	0.242
1-line combination irinotecan	57 (13)	45 (13)	12 (10)	0.249	51 (13)	6 (9)	0.352
Response rate 1-line
CR/PR	103 (23)	85 (26)	18 (14)	0.034	92 (24)	11 (18)	0.065
PD	45 (10)	30 (10)	15 (12)		35 (9)	10 (15)
PFS 1-line median in months	7.85	8.54	6.57	0.010	8.02	6.21	0.043
2-line chemotherapy	163 (36)	132 (40)	31 (25)	0.003	143 (39)	20 (30)	0.264
Response rate 2-line
CR/PR	25 (5)	21 (6)	4 (3)	0.293	23 (6)	2 (3)	0.252
PD	56 (12)	41(12)	15 (12)		46	10 (15)
